# Supplementary material for: Hydrogen Peroxide Promotes the Production of Radiation-Derived EVs Containing Mitochondrial Proteins
Source: MDPI journal article supplement (doi:10.3390/antiox11112119), 2022-10-27
Supplement: s1 [file s1]

**Supplementary Figures:**  
Hydrogen Peroxide Promotes the  
Production of Radiation-Derived EVs  
Containing Mitochondria

Caitlin Miller et al.

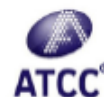

**Cell Line  
Authentication Service**  
STR Profile Report

FTA Barcode: STRC0621

ATCC Sales Order: SO1232033

| Test Results for Submitted Sample                                                                                                                                                                                                                                                 |                               |    |  |  | ATCC Reference Database Profile                                          |    |  |     |
|-----------------------------------------------------------------------------------------------------------------------------------------------------------------------------------------------------------------------------------------------------------------------------------|-------------------------------|----|--|--|--------------------------------------------------------------------------|----|--|-----|
| Locus                                                                                                                                                                                                                                                                             | Query Profile: PC-3/Clone 695 |    |  |  | Database Profile: PC-3; Prostate Adenocarcinoma;<br>Human (Homo sapiens) |    |  |     |
| D3S1358                                                                                                                                                                                                                                                                           | 16                            |    |  |  |                                                                          |    |  |     |
| TH01                                                                                                                                                                                                                                                                              | 6                             | 7  |  |  | 6                                                                        | 7  |  |     |
| D21S11                                                                                                                                                                                                                                                                            | 29                            |    |  |  |                                                                          |    |  |     |
| D18S51                                                                                                                                                                                                                                                                            | 14                            | 15 |  |  |                                                                          |    |  |     |
| Penta_E                                                                                                                                                                                                                                                                           | 10                            | 17 |  |  |                                                                          |    |  |     |
| D5S818                                                                                                                                                                                                                                                                            | 13                            |    |  |  | 13                                                                       |    |  |     |
| D13S317                                                                                                                                                                                                                                                                           | 11                            |    |  |  | 11                                                                       |    |  |     |
| D7S820                                                                                                                                                                                                                                                                            | 8                             | 11 |  |  | 8                                                                        | 11 |  |     |
| D16S539                                                                                                                                                                                                                                                                           | 11                            |    |  |  | 11                                                                       |    |  |     |
| CSF1PO                                                                                                                                                                                                                                                                            | 11                            |    |  |  | 11                                                                       |    |  |     |
| Penta_D                                                                                                                                                                                                                                                                           | 9                             |    |  |  |                                                                          |    |  |     |
| Amelogenin                                                                                                                                                                                                                                                                        | X                             |    |  |  | X                                                                        |    |  |     |
| vWA                                                                                                                                                                                                                                                                               | 17                            |    |  |  | 17                                                                       |    |  |     |
| D8S1179                                                                                                                                                                                                                                                                           | 13                            |    |  |  |                                                                          |    |  |     |
| TPOX                                                                                                                                                                                                                                                                              | 8                             | 9  |  |  | 8                                                                        | 9  |  |     |
| FGA                                                                                                                                                                                                                                                                               | 24                            |    |  |  |                                                                          |    |  |     |
| D19S433                                                                                                                                                                                                                                                                           | 14                            |    |  |  |                                                                          |    |  |     |
| D2S1338                                                                                                                                                                                                                                                                           | 18                            | 20 |  |  |                                                                          |    |  |     |
| Number of shared alleles between query sample and database profile:                                                                                                                                                                                                               |                               |    |  |  |                                                                          |    |  | 12  |
| Total number of alleles in the database profile:                                                                                                                                                                                                                                  |                               |    |  |  |                                                                          |    |  | 12  |
| Percent match between the submitted sample and the database profile:                                                                                                                                                                                                              |                               |    |  |  |                                                                          |    |  | 100 |
| The allele match algorithm compares the 8 core loci plus amelogenin only, even though alleles from all loci will be reported when available.                                                                                                                                      |                               |    |  |  |                                                                          |    |  |     |
| NOTE: Loci highlighted in grey (8 core STR loci plus Amelogenin) can be made public to verify cell identity. In order to protect the identity of the donor, please do not publish the allele calls from all the STR loci tested. Electropherograms showing raw data are attached. |                               |    |  |  |                                                                          |    |  |     |

**Explanation of Test Results**

Cell lines with 80% match are considered to be related; i.e., derived from a common ancestry. Cell lines with between a 55% to 80% match require further profiling for authentication of relatedness.

- ☐ The submitted sample profile is human, but not a match for any profile in the ATCC STR database.
- ☒ The submitted profile is an exact match for the following ATCC human cell line(s) in the ATCC STR database (8 core loci plus Amelogenin): CRL-1435
- ☐ The submitted profile is similar to the following ATCC human cell line(s):
- ☐ An STR profile could not be generated.

Additional Comments:

n/a

## Supplementary Figure S1: Cell line authentication (Clone 695)

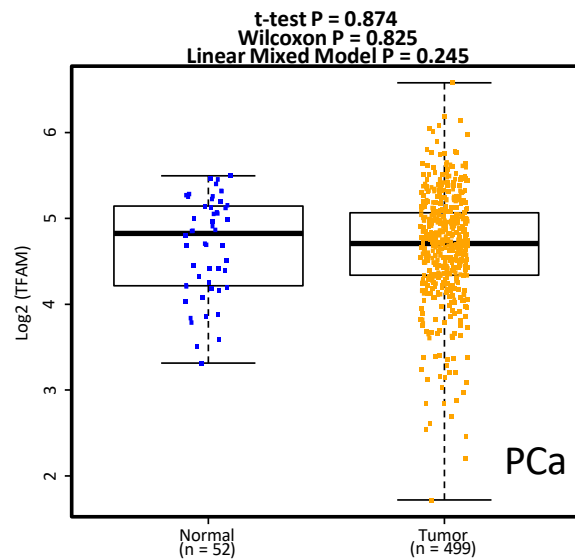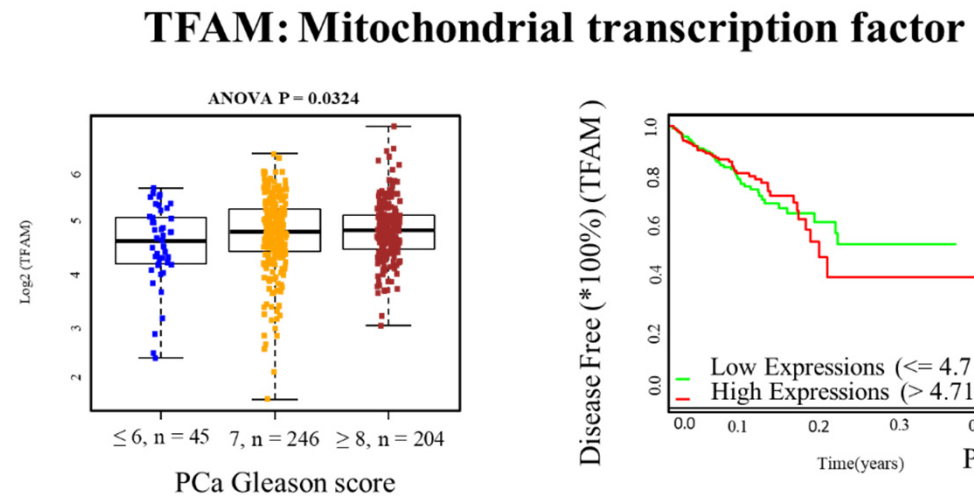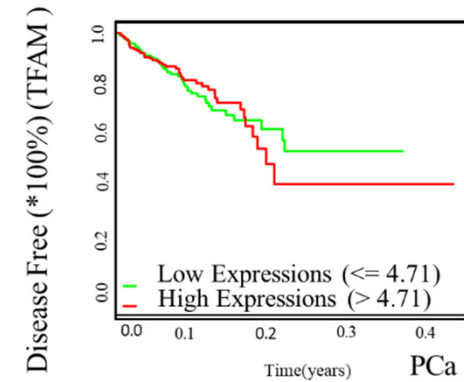

**Supplementary Figure S2. Oncomine TCGA analysis of PCa patients in varying stages of tumor progression.** TFAM mRNA expression at varying Gleason scores and Disease free percentage of patients with TFAM mRNA expression cut off at 4.71

| A. Imaris Algorithm for mitochondrial segmentation      |
|---------------------------------------------------------|
| Enable Region Of Interest = false                       |
| Enable Region Growing = true                            |
| Enable Tracking = false                                 |
| Enable Classify = true                                  |
| Enable Shortest Distance = false                        |
| [Source Channel]                                        |
| Source Channel Index = 2                                |
| Enable Smooth = true                                    |
| Surface Grain Size = 0.153 $\mu\text{m}$                |
| Enable Eliminate Background = false                     |
| Diameter Of Largest Sphere = 0.572 $\mu\text{m}$        |
| [Threshold]                                             |
| Enable Automatic Threshold = false                      |
| Manual Threshold Value = 123.967                        |
| Active Threshold = true                                 |
| Enable Automatic Threshold B = true                     |
| Manual Threshold Value B = 576.546                      |
| Active Threshold B = false                              |
| Region Growing Estimated Diameter = 0.200 $\mu\text{m}$ |
| [Filter Seed Points]                                    |
| "Quality" above 10.2                                    |
| [Filter Surfaces]                                       |
| "Number of Voxels Img=1" above 10.0                     |
|                                                         |

**Supplemental Figure S3:** A) Automated algorithm generated by Imaris software for segmentation of mitochondrion. B) Individual segmented mitochondrion.

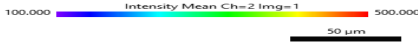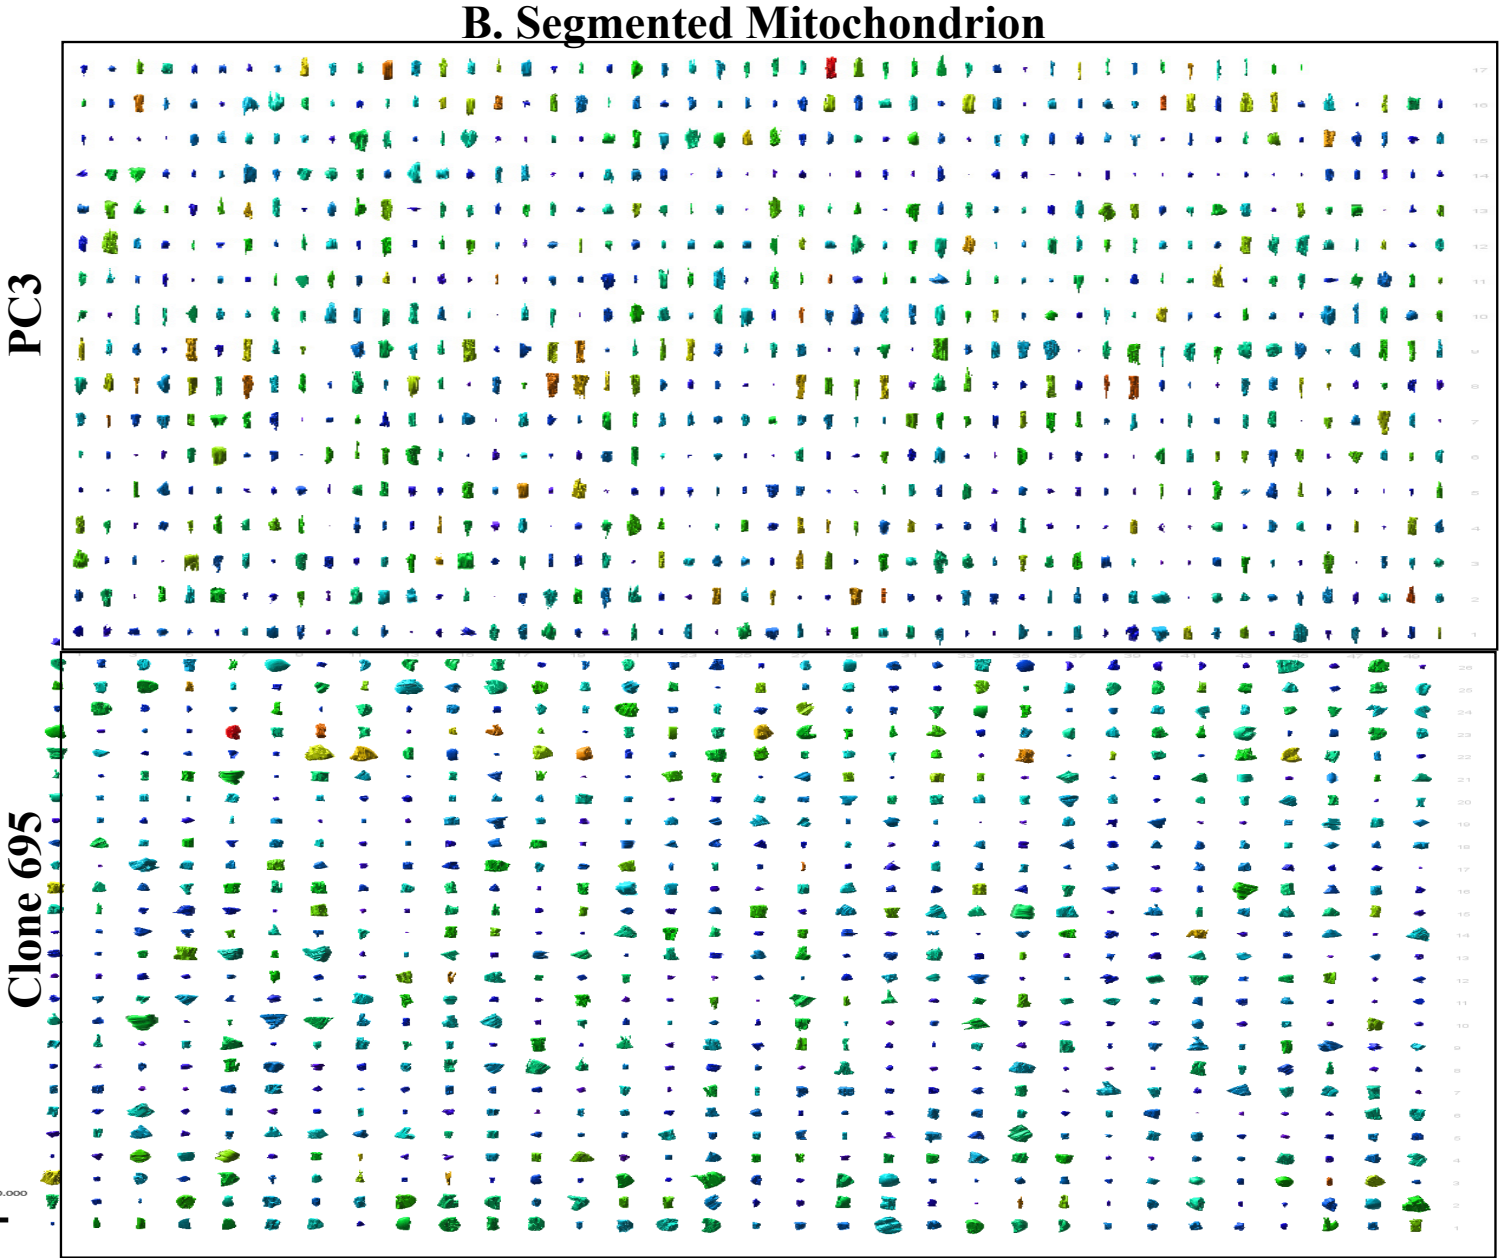

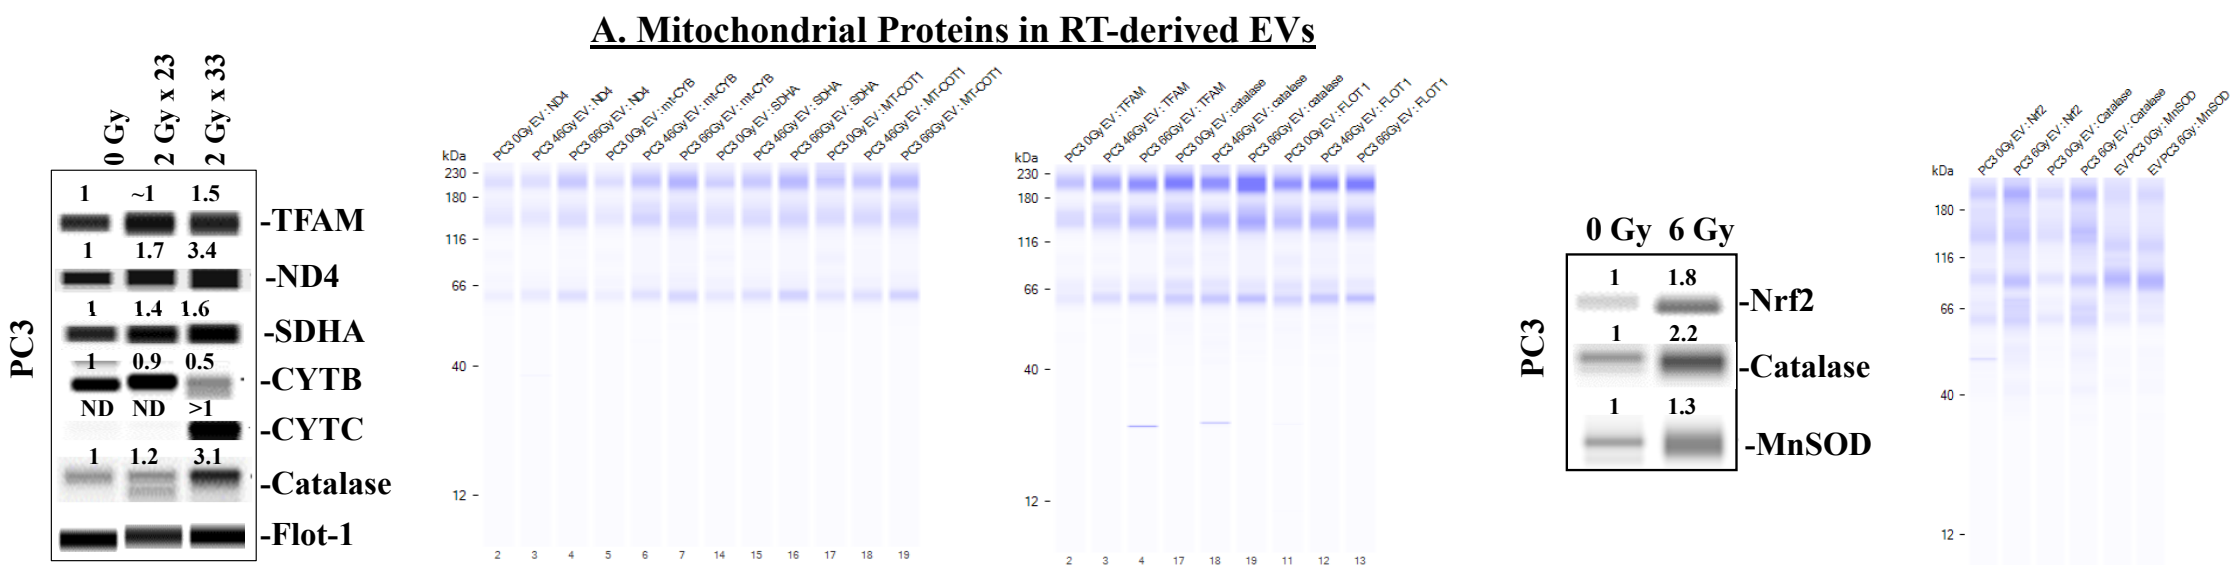

## B. Total loading proteins (1ug/ul) in RT-derived EVs and H<sub>2</sub>O<sub>2</sub>-derived EVs

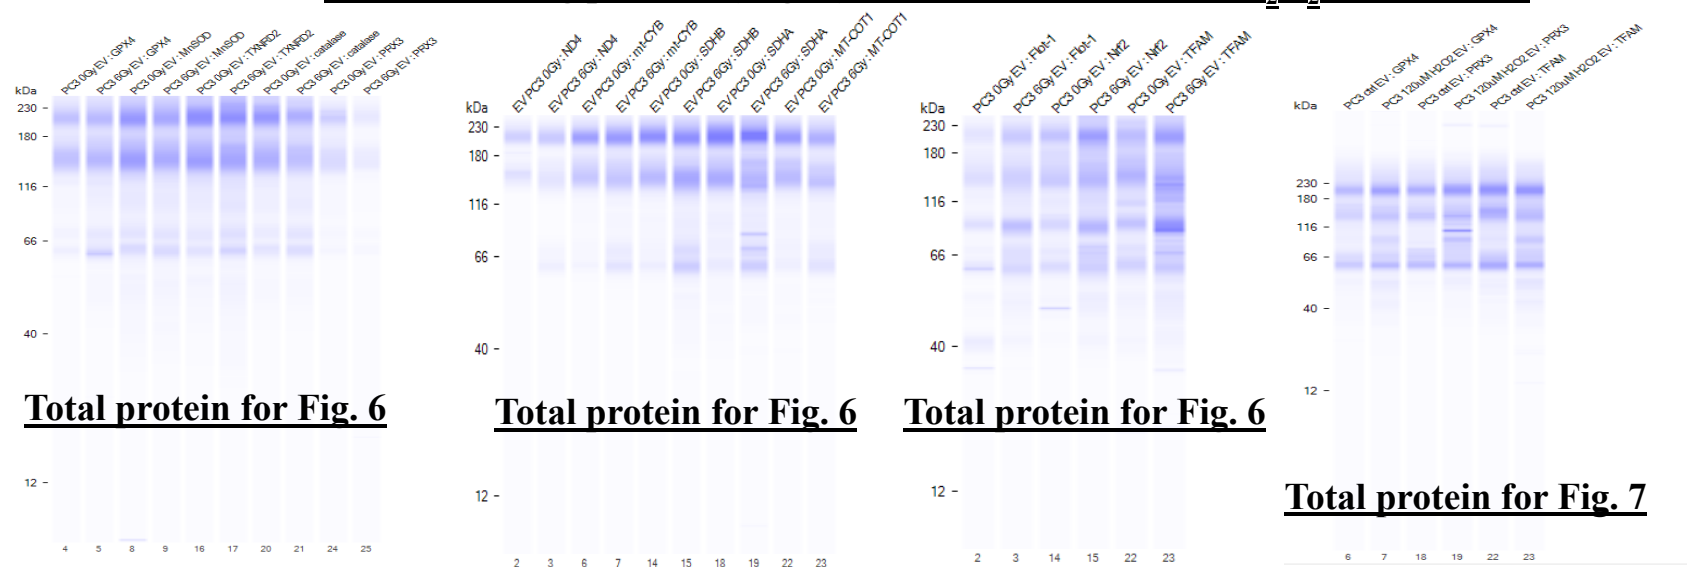

**Supplemental Figure S4: A)** Expressions of mitochondrial proteins in EVs isolated from post-RT PC3 cells. **B)** Total protein loading (1ug/ul) of each representative sample.
